# Supplementary material for: D-Chiro-Inositol Treatment Affects Oocyte and Embryo Quality and Improves Glucose Intolerance in Both Aged Mice and Mouse Models of Polycystic Ovarian Syndrome
Source: MDPI journal article supplement (doi:10.3390/ijms21176049), 2020-08-22

**Supplementary figure** (unedited blots) corresponding to  
results represented graphically in the Figure 5

## Definition of Experiment, groups and samples ID:

| Experiment 1 |            | Experiment 2 |           | Experiment 3 |          |
|--------------|------------|--------------|-----------|--------------|----------|
| AGED         | AGED + DCI | DHT          | DHT + DCI | TP           | TP + DCI |
| 1            | 6          | 61           | 61        | 80           | 88       |
| 2            | 7          | 62           | 62        | 81           | 89       |
| 3            | 8          | 63           | 63        | 82           | 90       |
| 4            | 9          | 64           | 64        | 83           | 91       |
| 5            | 10         | 65           | 65        | 84           | 95       |
| 6            | 15         | 66           | 71        | 86           | 96       |
| 7            | 16         | 67           | 72        | 87           | 97       |
| 8            | 17         | 68           | 73        | 88           | 98       |
| 9            | 19         | 69           | 74        | 89           | 99       |
| 10           | 20         | 70           | 76        | 90           | 100      |

\*Numbers correspond to female mouse ID from each group

**Whole individual membranes for mTOR (1),  $\alpha$ -Adaptin (2), GS (3), Akt (4), GSK-3 $\beta$  (5) and immunodetections.** A total of 4 gels were used to run 10 samples per group: Experiment 1 (groups: AGED and AGED + DCI), Experiment 2 (groups: DHT and DHT + DCI), Experiment 3 (groups: TP and TP + DCI). The whole blotted membrane from each gel was cut according to the molecular weight of the protein of interest and immunodetection was applied separately for each protein. The expression of  $\alpha$ -Adaptin was analyzed as a loading control per lane. Densitometry quantification of the bands with their means and SEM were represented in histogram charts shown in Figure 5.

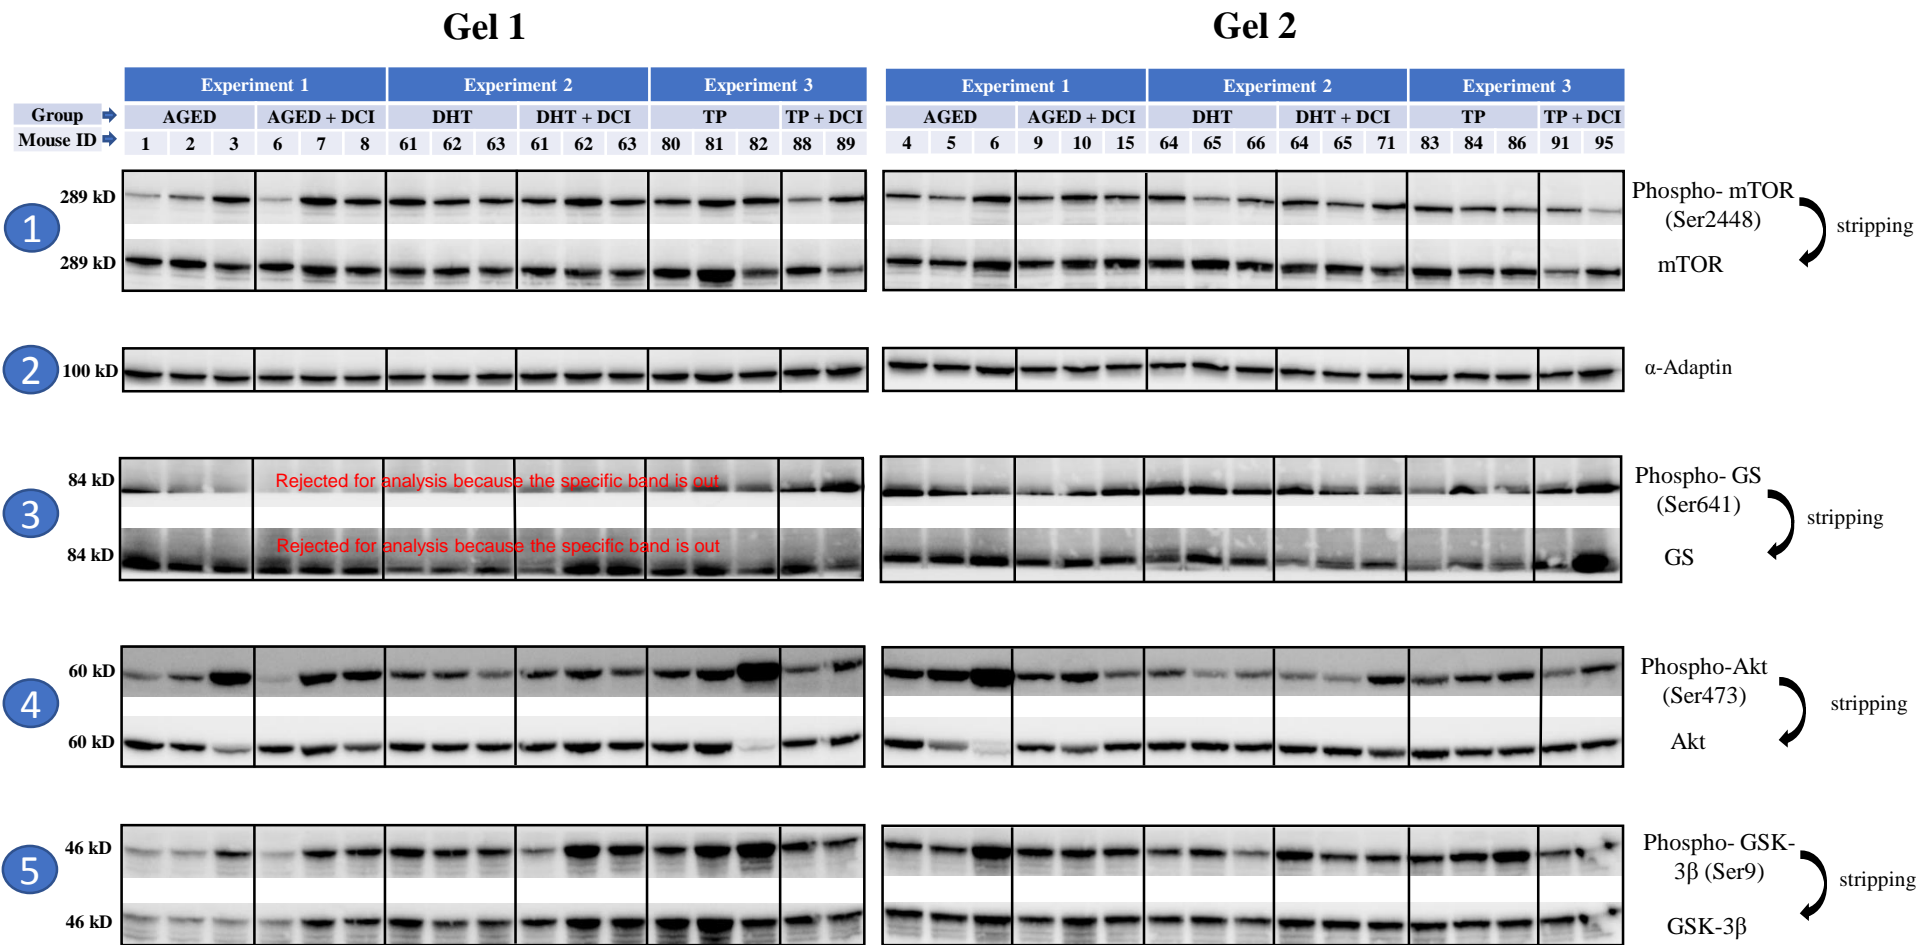

Gel 3

Gel 4

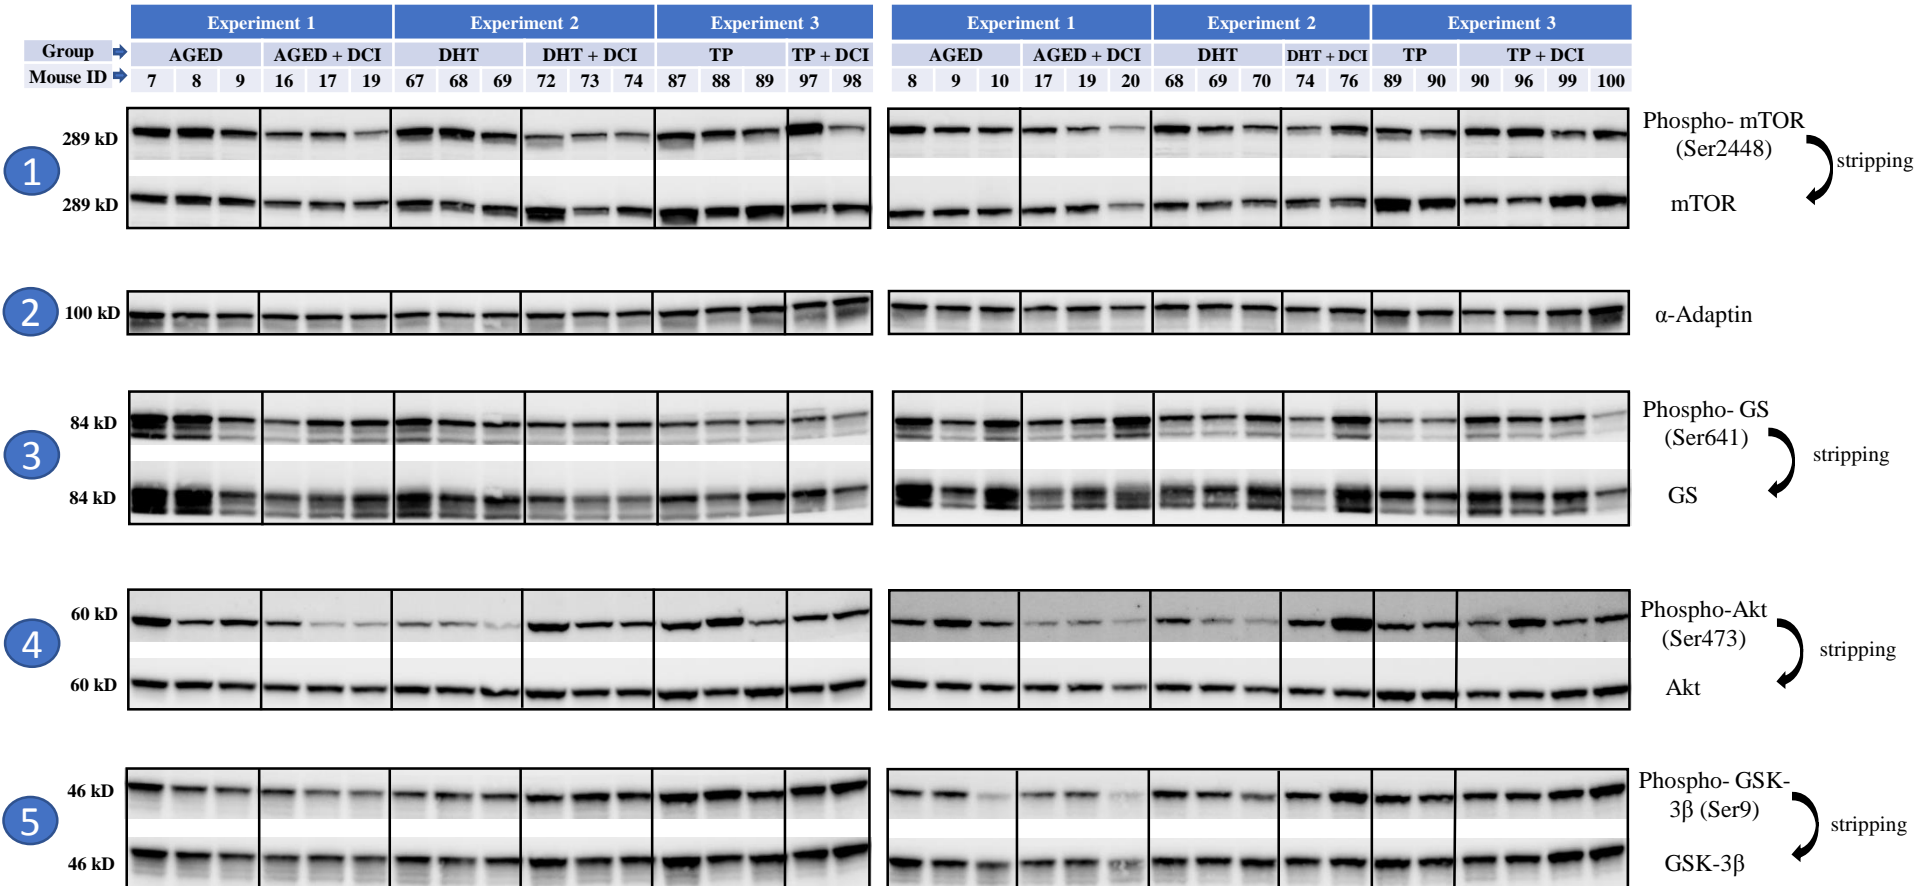

Supplement: s1 [file s1]
